# Supplementary material for: Delineation and Modulation of the Natural Killer Cell Transcriptome in Rhesus Macaques During ZIKV and SIV Infections
Source: Front Cell Infect Microbiol. 2020 Apr 29;10:194. doi: 10.3389/fcimb.2020.00194 (PMC7201019; doi:10.3389/fcimb.2020.00194)
Supplement: Supplementary file 6 [file Table_5.XLSX]

## Sheet: Blood
Table 4: RMtsig genes modulated by SIV in blood
Genes in Rmtsig
AAK1
ABCA7
ABCC10
ABHD12
ABI1
ABLIM1
ABR
ACAA1
ACAA2
ACAP2
ACBD3
ACLY
ACSL5
ACTB
ACTL6A
ACTR10
ACTR3
ADAM15
ADAR
ADD3
ADNP
ADPGK
ADRB2
ADRM1
ADSL
ADSS
AEN
AFTPH
AGFG1
AGPS
AHCYL1
AHSA2
AIM1
AK2
AK3
AKAP1
AKAP11
AKAP13
AKAP8L
AKIRIN2
AKR1B1
ALDH2
ALG3
AMD1
AMFR
ANAPC7
ANGEL1
ANKRD13D
ANKRD39
ANKRD44
ANKZF1
ANP32B
ANXA11
ANXA7
AP1G2
AP1S2
AP3M1
APAF1
APBA3
APBB1IP
APBB3
API5
APOBEC3G
APOBEC3H
APOL2
APPL1
ARAF
ARCN1
ARF1
ARF6
ARFGAP2
ARFGEF1
ARGLU1
ARHGAP15
ARHGAP25
ARHGAP30
ARHGAP9
ARID4B
ARID5B
ARIH2
ARL6IP5
ARL8B
ARMC8
ASCC2
ASCC3
ASNSD1
ASXL1
ASXL2
ATAD1
ATAD2B
ATF4
ATG16L1
ATG16L2
ATHL1
ATM
ATOX1
ATP10D
ATP11B
ATP13A1
ATP1A1
ATP2B1
ATP2B4
ATP5A1
ATP5C1
ATP5F1
ATP5G2
ATP5J
ATP6AP1
ATP6V0C
ATP6V0D1
ATP6V0E1
ATP6V0E2
ATP6V1D
ATP6V1E1
ATP6V1F
ATP6V1G1
ATPIF1
ATRX
ATXN2
AZIN1
BAG6
BAX
BAZ1A
BCAS2
BCKDHA
BCL2L1
BCL7B
BCL7C
BIN2
BIRC2
BMS1
BPTF
BRD2
BRD7
BRD8
BRD9
BRMS1
BRWD1
BST2
BTBD11
BTF3
BTG1
BUB3
BZW1
C11orf31
C11orf58
C11orf73
C11orf83
C12orf49
C14orf166
C17orf49
C17orf70
C19orf53
C19orf6
C19orf66
C1orf43
C1orf85
C6orf106
C7orf26
C9orf114
C9orf69
C9orf78
C9orf89
CALM1
CALM2
CALM3
CALU
CAND1
CANX
CAP1
CAPRIN1
CAPZA2
CAPZB
CARD11
CARS
CASC3
CASP8
CASP9
CAST
CAT
CBFB
CBX4
CCDC115
CCDC53
CCDC84
CCDC85B
CCDC88B
CCDC94
CCL3L1
CCM2
CCND2
CCND3
CCNDBP1
CCNG1
CCNL1
CCNT2
CCNY
CCPG1
CCT8
CD151
CD27
CD2BP2
CD37
CD3G
CD44
CD47
CD52
CD53
CD58
CD74
CD81
CD84
CD97
CD99L2
CDAN1
CDC23
CDC37
CDC5L
CDK13
CDK5RAP2
CDK5RAP3
CDKN2D
CEPT1
CERK
CGGBP1
CHD4
CHD8
CHFR
CHMP2A
CHTF8
CHURC1
CIB1
CIRBP
CITED2
CLDND1
CLEC2D
CLIC1
CLINT1
CLK1
CLK2
CLK3
CLN3
CLNS1A
CLPP
CLTB
CMTM6
CNBP
CNOT1
CNOT10
CNOT8
COASY
COG3
COG5
COMMD5
COMMD7
COMT
COPB1
COPB2
COPS4
COPS6
COPS7A
COPS7B
COPS8
COQ6
CORO1B
CORO1C
COTL1
COX5B
COX6B1
CPD
CPNE1
CPNE3
CPSF4
CPSF6
CREB1
CRELD1
CRK
CRKL
CRLF3
CRTC3
CSDE1
CSE1L
CSGALNACT2
CSNK1A1
CSNK1G1
CSNK1G2
CSRNP1
CTBP1
CTC1
CTDSP1
CTNNB1
CTNNBL1
CTR9
CTSB
CUL1
CUL4B
CUL9
CUTA
CWC22
CXXC1
CXXC5
CYB5B
CYC1
CYFIP2
DAZAP1
DCAF11
DCAF12
DCAF6
DCAF7
DCLRE1C
DCPS
DCTN3
DDA1
DDX1
DDX17
DDX19A
DDX39A
DDX47
DDX51
DDX60
DDX60L
DENND4B
DENR
DERL2
DGAT1
DGCR6
DGKA
DHX15
DHX37
DIS3L
DKC1
DLD
DMAP1
DMTF1
DNAJB1
DNAJB6
DNAJC10
DNAJC13
DNAJC7
DNMT1
DNPEP
DOCK8
DOPEY2
DPF2
DPP7
DPP8
DPY30
DR1
DSTN
DSTYK
DUS1L
DVL3
DYNC1I2
DYNLL1
DYNLRB1
DYRK1A
EBP
ECH1
EDC4
EDEM1
EED
EEF1B2
EEF2
EFHA1
EI24
EIF1AX
EIF2AK4
EIF2B3
EIF3A
EIF3E
EIF3F
EIF3K
EIF3L
EIF3M
EIF4A1
EIF4B
EIF4G1
EIF5A
ELF4
ELMO1
ELOVL5
EML2
EML3
ENO2
ENTPD4
ENY2
EOMES
EPC1
ERI3
ERLEC1
ESD
ESYT1
ETFA
ETFB
ETS1
EVI2B
EVI5L
EVL
EWSR1
EXOC4
EXT2
EZH2
FAM104A
FAM108A1
FAM108B1
FAM120AOS
FAM13B
FAM172A
FAM178A
FAM43A
FAM49B
FAM53C
FAM65B
FAM96A
FAM96B
FAM98C
FAS
FBXL15
FBXL5
FBXO18
FBXO21
FBXO38
FBXO46
FBXO7
FBXO9
FBXW4
FCGR3B
FECH
FER1L5
FES
FGD3
FGR
FIBP
FIG4
FKBP11
FKBP2
FKBP3
FNTA
FOXO1
FOXRED1
FRG1
FTSJ1
FTSJ3
FTSJD2
FUCA1
FUK
FXR1
FXYD5
FYN
G3BP1
G3BP2
GABARAPL2
GALE
GALT
GAPVD1
GATA3
GBP1
GCLM
GCN1L1
GDI1
GDI2
GET4
GFI1
GFM1
GGA3
GIGYF1
GLB1
GLG1
GLIPR1
GLO1
GLRX3
GLS
GLT8D1
GMFG
GNAS
GNB2L1
GNG2
GNL2
GNLY
GNPAT
GNPTAB
GOLGA5
GOLGA7
GOLPH3
GORASP2
GPANK1
GPBAR1
GPBP1L1
GPN2
GPR137
GPR153
GPS1
GPSM3
GPX4
GRAMD1A
GRIPAP1
GRSF1
GSDMD
GSK3B
GSPT1
GSTM5
GTF2A2
GTF3C2
GYG1
GYPC
H2AFV
H2AFX
H2AFY
HADH
HADHB
HARS
HAT1
HDAC2
HEBP2
HECTD3
HERC3
HERC4
HGS
HIF1AN
HIPK3
HIST2H2AA4
HM13
HMG20A
HMGB1
HMGN1
HMGN3
HMGXB3
HN1
HNRNPA0
HNRNPA1
HNRNPAB
HNRNPC
HNRNPD
HNRNPM
HNRNPR
HOPX
HSD11B1L
HSD17B10
HSD17B11
HSH2D
HSP90AB1
HSPA4
HSPA8
HSPD1
IAH1
IARS2
IDH3G
IDUA
IFFO1
IFI27
IFI27L2
IFI35
IFI6
IFITM1
IGBP1
IGF2R
IGHMBP2
IKBKB
IKBKG
IKZF1
IL10RB
IL11RA
IL27RA
IL7
ILF2
ILK
ILVBL
IMP3
INPP4A
INTS1
INTS8
IP6K1
IP6K2
IPO5
IQGAP2
IRAK1
IRF2
IRF2BP2
IRF7
IRF8
ISG20
ITFG1
ITGAL
ITGB1
ITGB1BP1
ITK
ITPA
ITPR3
IVNS1ABP
JOSD1
JUN
KATNB1
KCMF1
KDM2A
KDM3A
KDM5A
KHDRBS1
KHSRP
KIAA0141
KIAA0922
KIAA1671
KIAA2026
KIF1B
KIF22
KIF2A
KIR2DL4
KLF2
KLF6
KLF8
KLHL20
KLHL24
KLHL9
KPNA3
KTN1
L3MBTL2
LANCL1
LARP7
LAS1L
LAT
LAT2
LBR
LCAT
LCOR
LEMD2
LIG1
LILRB1
LIMS1
LIPA
LLGL2
LMAN2L
LMBR1L
LMNB2
LNPEP
LONP1
LPXN
LRCH3
LRCH4
LRP11
LRRC14
LRRC47
LRSAM1
LRWD1
LSM3
LSM7
LSP1
LTB
LUC7L
LUC7L3
LYST
MAD2L2
MADD
MAGOH
MAGT1
MAN1B1
MAP2K1
MAP2K4
MAP4K2
MAPK8IP3
MAPKAP1
MAPKAPK3
MAPRE2
MARK2
MAT2B
MAX
MBD1
MBD4
MBNL3
MCFD2
MCM3AP
MCRS1
MDH1
MDH2
MED20
MED22
MED27
MED4
MED8
METAP2
METTL17
MFF
MFSD11
MFSD5
MFSD6
MGAT2
MID1IP1
MIF
MLEC
MLF2
MLL
MLL5
MLLT6
MMADHC
MORF4L1
MOV10
MPZL1
MRFAP1L1
MRPL10
MRPL43
MRPS12
MRPS15
MRPS25
MRPS26
MRPS27
MRPS6
MSH2
MSH3
MSH6
MST4
MTA2
MTDH
MTMR14
MTMR4
MTPN
MTRR
MUTYH
MVP
MYADM
MYL12A
MYLIP
MYO18A
MYO1G
MYO5A
N4BP2
N4BP2L1
N4BP2L2
NAA50
NAAA
NACA
NAE1
NAGK
NAP1L1
NAPA
NBEAL2
NCAPH2
NCL
NCLN
NCOA1
NCOA2
NCOA5
NDST2
NDUFA1
NDUFA10
NDUFA13
NDUFA7
NDUFAB1
NDUFB11
NDUFB5
NDUFB7
NDUFB8
NDUFS7
NDUFS8
NECAP1
NEDD9
NEK8
NEMF
NEURL4
NFIL3
NFKBIA
NFX1
NFYA
NGDN
NHP2
NINJ1
NLRC5
NLRX1
NMRAL1
NNT
NOC4L
NOP58
NOTCH1
NPEPL1
NPLOC4
NPRL2
NPTN
NSD1
NSFL1C
NSMCE4A
NSUN5
NT5C2
NUB1
NUCB2
NUDT1
NUDT21
NUMB
NUP133
NUP205
NUP50
NUP88
NXF1
OAS2
OCIAD1
ODC1
ODF2
OGT
OPA1
ORAI3
ORMDL1
OSBP
OSBPL11
OSBPL8
OSBPL9
OSTF1
OXA1L
P2RX4
P4HTM
PABPC1
PAFAH1B2
PAN2
PANK2
PAPD4
PAPD5
PARP1
PARP10
PARP12
PARP14
PARP4
PARP6
PARP8
PARP9
PCNA
PCNT
PCTP
PDCD10
PDCD4
PDCD6IP
PDCD7
PDE3B
PDE4A
PDE6D
PDGFD
PDGFRB
PEF1
PEX16
PFDN5
PFN1
PGM3
PHC3
PHF23
PHF3
PHIP
PHKG2
PHRF1
PHTF1
PI4K2B
PI4KB
PIAS1
PIAS3
PIAS4
PICALM
PIGC
PIGO
PIGQ
PIK3CD
PIK3R1
PIP4K2B
PJA2
PLAC8
PLEKHA1
PLEKHM1
PLEKHO2
PLRG1
PLSCR3
PLXNA3
PML
PMM2
PMPCB
PNKP
PNMA1
PNPLA6
POGK
POLD3
POLR1B
POLR2A
POLR2B
POLR2F
POLR2H
POLR3GL
POMGNT1
POMP
PPA2
PPCS
PPHLN1
PPM1B
PPM1F
PPM1K
PPM1M
PPP1CA
PPP1CB
PPP1R11
PPP1R12A
PPP1R15A
PPP1R7
PPP1R8
PPP2CA
PPP2R1A
PPP2R3C
PPP2R5C
PPP2R5D
PPP3CA
PPP4C
PPRC1
PPT1
PQLC1
PRDM2
PRDX1
PRDX3
PRDX5
PREB
PRELID1
PRKAR1A
PRKCB
PRKDC
PRKX
PRPF3
PRPF38A
PRPF4
PRPSAP2
PSD4
PSEN1
PSMA3
PSMA7
PSMB10
PSMB3
PSMB9
PSMC6
PSMD14
PSMD2
PSMD4
PSMD6
PSMD7
PSMD8
PSME1
PSME2
PSME4
PSMF1
PSPC1
PSTPIP1
PTGES2
PTGES3
PTMA
PTP4A2
PTPLAD1
PTPRA
PTPRE
PUF60
PUM1
PUM2
PURA
PUS1
PWP1
PYCARD
PYCR2
PYGO2
PYHIN1
QDPR
QKI
R3HCC1
R3HDM2
RAB11FIP1
RAB11FIP3
RAB22A
RAB24
RAB27A
RAB35
RAB4A
RAB8B
RABEP1
RABGAP1
RAC1
RAC2
RAD21
RAD9A
RALGAPA2
RALGAPB
RAN
RAP1GAP2
RAPGEF1
RASA3
RASAL3
RASGRP1
RASSF1
RASSF5
RB1
RBBP7
RBM10
RBM12
RBM17
RBM27
RBM3
RBM33
RBM42
RBPJ
RBX1
RCE1
RDBP
RETSAT
REV3L
REXO1
RFTN1
RFWD2
RFXANK
RHOA
RHOC
RHOT2
RHOU
RIF1
RIN3
RIPK3
RLF
RNASEH2A
RNF113A
RNF115
RNF126
RNF181
RNF20
RNF31
RNF34
RNFT1
ROMO1
RPA1
RPA2
RPA3
RPF1
RPL10A
RPL21
RPL23
RPL26
RPL3
RPL30
RPL32
RPL37A
RPL38
RPL4
RPL41
RPL5
RPL6
RPL7
RPL7A
RPLP0
RPLP1
RPS11
RPS15A
RPS18
RPS2
RPS26
RPS27
RPS27A
RPS3
RPS3A
RPS4X
RPS6
RPS6KB2
RPS7
RPS9
RPSA
RPUSD1
RRAGA
RRN3
RRP12
RSBN1
RSBN1L
RSF1
RSRC2
RTN3
RTN4
RWDD1
S100A10
SACM1L
SAFB2
SAP18
SARNP
SBF1
SBNO1
SCAF11
SCAP
SCAPER
SCML4
SCYL2
SDAD1
SDCBP
SDF2L1
SEC11C
SEC13
SEC14L1
SEC23B
SEC23IP
SEC24B
SEC62
SECISBP2
SELK
SELT
SERBP1
SERINC1
SERTAD1
SET
SETD2
SETX
SF3B1
SF3B4
SF3B5
SFT2D1
SGSM2
SH3BGRL
SH3KBP1
SHFM1
SHOC2
SIGIRR
SIK1
SIPA1
SIVA1
SKAP2
SKIV2L
SKIV2L2
SKP1
SLC12A9
SLC15A4
SLC25A20
SLC25A28
SLC25A3
SLC25A42
SLC30A9
SLC35A1
SLC35A2
SLC35A4
SLC35B2
SLC35C2
SLC35E1
SLC38A2
SLC38A5
SLC39A3
SLC3A2
SLC4A1AP
SLC50A1
SLC9A1
SMAD4
SMAP2
SMARCA2
SMARCA5
SMARCC1
SMARCE1
SMC3
SMC6
SMEK2
SNAP23
SNAPC4
SNAPIN
SNRNP25
SNRNP40
SNRNP70
SNRPA
SNRPB
SNRPB2
SNX14
SNX3
SNX4
SNX5
SNX6
SOD1
SON
SOS1
SP110
SP3
SPCS2
SPEN
SPG11
SPG7
SPN
SPNS1
SPOP
SPRY2
SQSTM1
SRI
SRM
SRP54
SRP9
SRPRB
SRSF1
SRSF3
SRSF6
SRSF7
SSB
SSBP1
SSH2
SSR2
SSU72
ST14
ST6GAL1
STAG1
STAG2
STARD3
STARD3NL
STAT1
STAT2
STAT6
STAU1
STK11IP
STK16
STK4
STOML2
STRA13
STRN
STT3A
STX8
STXBP2
STXBP3
SUB1
SUDS3
SUGP1
SUGP2
SUMF2
SUPT16H
SYNCRIP
SYNE1
SYPL1
TAB2
TAF10
TAF7
TAOK3
TAP1
TAP2
TAPBP
TAX1BP1
TAX1BP3
TBC1D17
TBC1D22A
TBL1X
TCEA1
TCEB3
TCERG1
TCF12
TCF20
TCIRG1
TCTA
TEX264
TFG
TFIP11
TGIF1
TGOLN2
THOC5
TLE3
TM9SF2
TM9SF3
TMBIM6
TMCO3
TMED10
TMED4
TMED9
TMEM106A
TMEM14C
TMEM183A
TMEM19
TMEM203
TMEM216
TMEM42
TMEM43
TMEM59
TMEM66
TMX2
TNFAIP8
TNFRSF18
TNFSF14
TNIP2
TNK2
TNRC18
TOB2
TOM1
TOMM40
TOMM7
TOP2B
TOR1A
TP53I13
TPD52
TPD52L2
TPI1
TPM2
TRABD
TRAM1
TRAPPC10
TRAPPC8
TRERF1
TRIM14
TRIM22
TRIM25
TRIM27
TRIM4
TRIP4
TRMT1
TRMT112
TROVE2
TRPC4AP
TRRAP
TSC1
TSG101
TSNAX
TSPAN17
TSPAN3
TSPYL1
TSPYL2
TSR2
TTC1
TTC14
TUBA1A
TUBB
TUBGCP2
TUBGCP6
TXNDC15
TXNIP
TXNRD2
TYK2
TYSND1
U2AF1
UBA3
UBA7
UBB
UBC
UBE2A
UBE2E3
UBE2G1
UBE2H
UBE2J1
UBE2K
UBE2L3
UBE2L6
UBE2N
UBE3A
UBE4A
UBQLN1
UBR3
UBTF
UBXN1
UBXN4
UBXN6
UCKL1
UFC1
UGP2
UNC50
UPF1
UPF2
UPP1
UQCRC2
URM1
USO1
USP15
USP16
USP21
USP38
USP5
USP7
USP8
USP9X
VAMP5
VAMP7
VAPB
VASP
VCPIP1
VDAC1
VDAC3
VEZF1
VIM
VPS13B
VPS16
VPS29
VPS35
VPS36
VPS37A
VPS41
VPS4B
VPS52
VRK1
WAC
WARS
WBP2
WBSCR22
WDR1
WDR13
WDR18
WDR5
WDR74
WDR83
WIPF1
WNK1
WTAP
XBP1
XPO6
XPO7
XRCC5
XRCC6
XRN1
XRN2
YIF1A
YIPF3
YME1L1
YTHDF2
YWHAB
YWHAH
YWHAQ
YY1
ZBP1
ZBTB4
ZBTB40
ZBTB43
ZBTB48
ZC3HAV1
ZCCHC11
ZCCHC6
ZDHHC3
ZDHHC6
ZFAND5
ZFAND6
ZFP36
ZFP36L1
ZFR
ZMYM5
ZMYND11
ZMYND8
ZNF146
ZNF207
ZNF212
ZNF22
ZNF326
ZNF414
ZNF513
ZNF598
ZNF652
ZNF692
ZNFX1
ZNRF2
ZRSR2
ZZZ3

## Sheet: LN
Table 4: RMtsig genes modulated by SIV in LN
Genes in Rmtsig
FOS
GSDMD
DMAP1
RPL26
JUN
PSMB10
COPS7B
CLEC2D
UBE2L6
ISG20
C19orf66
NAGK
RPL21
KHSRP
TAP1
HIST2H2AA4
APOL2
ATP6V1F
UBTF
TAF10
IFITM1
CYC1
STAT2
SLC25A28
BUB3
CARS
PSMF1
CCM2
CBFB
EVL
PURA
TEX264
GPX4
RAB3GAP2
YTHDF2
POLR2F
CXXC5
MAD2L2
ZFP36
TRPC4AP
RIPK3
PSME2
NDUFB8
MFF
RPS9
CTNNBL1
IFI27
CSNK1D
C1orf63
PFN1
TAX1BP3
IRF7
SRSF5
STAT6
SLC38A5
WBSCR22
C1orf43
UBB
CIB1
FOXRED1
PIAS4
RPL7
PSMD4
TROVE2
BST2
APOBEC3H
ATM
WTAP
PSMB9
SMARCA2
RNF115
TXNIP
ROMO1
ZNF644
DHX15
MPZL1
DDX17
RNF149
PPP4C
IL27RA
AKAP1
BCL7B
HARS
NINJ1
PABPC1
MRPS26
PEX16
TOMM40
NUB1
SDF2L1
CD81
PCBP1
DDA1
GRN
MFSD3
ATP6V1E1
NDUFB11
STAT1
ST13
PSME1
FTSJD2
WDR18
STK4
DDX60
PPP1R12A
ARF1
GSK3B
PDE4A
BMS1
FOSB
CDC37
OAS2
MAP3K1
CAT
CS
ARHGDIB
PMM2
ADRM1
OCIAD1
DPF2
SLC3A2
ABR
H2AFY
RNF181
SLC38A2
ACAA1
CCDC12
CD2BP2
FAM49B
PHF3
CENPK
IFI6
APPL1
IFI35
ATOX1
VRK3
ZNF146
STAG2
SLC35B1
UBC
HNRNPAB
CXXC1
TXNDC15
APBB3
PPP2R2A
ABHD2
LSP1
AP1S2
APBA3
FAM13B
NAP1L1
BRMS1
OXA1L
PSMC5
GSTP1
HSD17B11
ZRSR2
PRKCB
CCND3
WDR83
GBA
DDRGK1
KLHL24
FKBP11
PCNX
CSE1L
SERINC1
GNAS
PLAC8
SSU72
NLRC5
LRRFIP1
RAPGEF2
UBXN1
PI4KB
PTGES3
FAM53C
CCL3L1
TSPAN17
SYPL1
SMARCC1
SNRPB
MVP
APOBEC3G
PCNT
ERI3
HDAC2
IKZF1
LAS1L
MCRS1
PRKDC
DNAJC8
GLRX3
ASCC2
ATP5G2
CLTB
FAM96B
UBE2E3
KLF6
LPCAT3
TOM1
RNF126
RPS3
PUF60
SETD2
YY1
RNF220
CMTM6
NPEPL1
LY6E
CTBP1
UBA7
USP11
PARP12
ZDHHC6
UBQLN1
NFKBIA
RPL12
VPS16
TALDO1
SP3
FIG4
GRIPAP1
SS18
PARP10
DYNLL1
ZBP1
UBR2
C1orf85
OSBPL8
HMGXB3
TCIRG1
FAM63A
STARD3NL
MRPS18B
NDUFS7
CWC22
COMT
SNRNP25
DENND4B
CSNK2B
PTGES2
CIRBP
UNC93B1
FAM49A
EED
ATP6V0D1
YWHAZ
WBP11
CDKN2D
NUCB2
SUGP1
FOXN3
GPN2
ADSL
TYSND1
GPBP1L1
STRA13
PIK3R1
GLRX5
MLF2
ATP13A1
GBP1
DHX37
CCDC142
CCDC94
ATP6V0C
FBXO7
RAB8B
CYFIP2
PML
ADNP
RPL10A
MAN1B1
ATP5B
FER1L5
CFL1
BAG6
ACTR3
PAPD4
PTPLAD1
MIF
RPL32
PRKAR1A
C9orf89
JMJD1C
EIF3M
SH3BGRL
ARHGAP30
BCL2
MRPL53
EIF4E2
FAM43A
PI4K2B
KATNB1
RPL7A
HSPD1
USP16
MOV10
FAM108B1
CTSC
CTR9
IKBKG
UHRF2
DDX60L
CRTC3
PICALM
PDCD6IP
ATAD1
HECTD3
CEPT1
COASY
ZMAT2
IVNS1ABP
TYK2
TMEM106C
RHOA
FES
ESYT1
AMFR
GNPAT
RFXANK
EIF5B
E2F4
RPS27A
AP1G1
TMSB10
RBM17
TSG101
GNG2
EXOSC7
HAT1
SDHA
ALG3
PDS5A
FOXP1
UGP2
PNKP
SMAP2
FKBP2
STK25
DNAJC10
PLEKHO2
SDHB
C19orf53
SPAG7
ADAM15
TCEB3
STAU1
SLC9A1
ROCK1
AKAP11
ACTL6A
TMBIM6
LUC7L3
TM9SF2
CBX4
RBPJ
ZYX
CD47
ATG16L1
ADSS
MED27
RSBN1
HELZ
PPM1B
TAP2
HNRNPU
EWSR1
GOLPH3
DGKD
ATPIF1
EMP3
MRPS18A
SPOP
AATF
PHRF1
INTS8
TNK2
KLHL28
FLOT1
DNPEP
FOXO3
TMUB1
DYRK2
GNA13
ECH1
BRD2
ZMYND11
KTN1
AFTPH
REXO1
EIF6
LIG1
BAX
EIF4A1
GADD45B
TRANK1
SMC3
PTRH1
WAC
HADHB
GNL1
PPP2R3C
MAPKAPK3
ADAR
AP3M1
MTDH
TRIM21
GDAP2
USO1
ACAP2
SET
PSMB2
TPRA1
RAPGEF1
PPRC1
MRPS12
GRAMD1A
ZNF622
HNRNPM
ATP6V1G1
SIPA1
PRMT1
SPG7
FBXW4
AKIRIN2
PUM2
LRRC41
ZNF326
TUBA1A
AGFG1
KAT2A
DCAF6
FTL
TIMM17B
UQCRC2
COX5B
NDUFB7
CGGBP1
TIPARP
THOC5
NDUFA7
ARHGAP12
ZFAND6
TMEM66
PJA2
FLAD1
IRF1
ZDHHC24
HNRNPUL1
CCT8
PSMB3
ARID5B
CALM3
SYNCRIP
MTCH1
PIGQ
COG8
CTNNB1
BRD8
NAA50
BCKDK
MACF1
ZBTB4
PPOX
ETFB
RPS6
C9orf114
CD44
PTPRE
TM9SF3
TRMT1
NPTN
MBD4
CD63
SHOC2
SLC4A7
EFHA1
RPL6
DDX27
LRWD1
NAAA
NDUFAF3
RPS4X
R3HCC1
C22orf28
SNRPA
NCOA1
ARAF
PPM1K
RPL3
EIF5A
PSENEN
ARFGEF1
IL4R
GYG1
SNX6
TMED9
HGS
GNAI2
SLC39A3
BCLAF1
PAF1
MCFD2
NOTCH1
RDBP
MMADHC
GDI2
RNASEH2A
ANKRD39
PTMA
HNRNPH1
CDK13
ZNF394
NDUFS8
LAMP2
MTMR4
BAZ1A
NLRX1
SRSF3
ARFGAP2
GALE
PIN1
NSD1
RUSC1
YIF1A
HM13
PRPSAP2
TGFBR2
MUTYH
FAM120B
COPB1
GPR137
RASSF7
SEC13
ARL6IP5
ABCF1
RPL38
ELOVL5
USP9X
RPUSD3
DSTN
RALGAPA2
SP110
WDR13
NUMB
LSM3
METTL13
TMEM57
RNF13
TPD52L2
COQ6
RPL5
ODF2
SF3B1
C17orf70
RAB27A
DOCK8
NME4
JUNB
CLK3
PPM1M
NDUFB5
FGR
TCTA
MST4
ELF4
STK39
GFM1
DDX18
DDX5
GOLGA7
TAPT1
GNLY
EIF2B4
ATP5L
KLHL9
BZW1
GMPPA
NCOA3
PPP1CB
STOML2
VEGFA
DAXX
COX4I1
MLLT6
N4BP2L2
CNOT7
BCL2L1
MED10
RSRC2
SSBP1
SCAND1
YME1L1
FBXW2
CAPZA2
SVIL
CHMP4A
U2AF1
MFSD11
CAPZB
SLFN5
SBF1
DNTTIP1
NDUFA13
ZNFX1
TRIP12
C17orf49
KEAP1
MRFAP1
VPS72
PARP9
EXOSC4
ATP2B1
NPRL2
CCPG1
PUS1
RALGAPA1
CARD11
ADPGK
HERC4
VAMP5
BCKDHA
UBA52
ZNF22
PFDN5
RPLP0
TOP3B
XRN2
GZMA
TARDBP
ZFP36L1
SEC14L1
LRCH4
WARS
SPG21
RSBN1L
RAC1
LIMS1
RAB4B
ENTPD4
CYBA
DCPS
RBCK1
PARVG
SRM
IDH3G
RTN4
RPS19BP1
KDM5A
LUC7L
DGCR8
SRSF6
PLCL2
ZNF395
ATP6V0E2
HSH2D
CTAGE5
ERLEC1
TLN1
GLS
AHSA2
ATP11B
NOC4L
FAM172A
RPL27
ATP5F1
RFTN1
MTPN
SCYL2
RNF145
SLC7A6
ZHX2
NUDT21
PYCR2
DCAF7
MBNL1
RAB11FIP3
SNX17
TXN
TSC22D3
DCTN3
NCLN
IFFO1
CD3G
RALGAPB
CPNE3
RANGAP1
RAB8A
WASL
TRIM22
PITPNB
DIDO1
BCL7C
WDR46
KLHL2
SNX14
HMGB1
ZBED5
ARHGAP25
SKAP2
PIM1
ELF2
ITGAL
BTBD11
DENND3
UBAP1
RAB35
PLEKHM1
HECTD1
CREBBP
MRPS31
STK19
FECH
ANXA2
GPBAR1
CCND2
SSSCA1
PSMD6
SOS1
PSTPIP1
MPDU1
ZNF512
ABHD3
SLC4A1AP
WAS
ACLY
TPST2
ID2
TRAPPC3
TRIM4
KHDRBS1
ARHGAP9
G6PD
WIPF1
JUND
GSTM5
BRD7
METAP2
CHTF8
SDHAF2
DLD
KPNA3
SCAMP2
PSD4
EIF3I
SF3B5
CCDC85B
SCAPER
UQCRC1
OXSR1
UBE2I
HDAC1
PPCS
RAB22A
TRABD
VDAC1
STAT3
CRTC2
TBC1D17
FAM98C
TAPBP
RAN
RBBP6
B4GALT3
VPS36
RNASET2
RRNAD1
ARCN1
BRD9
ORAI3
SOD1
CPNE1
CREB1
NUDT1
PNRC2
PDPK1
ALKBH5
ZFC3H1
WDR74
LCMT1
NUP160
DDX56
STK16
WNK1
STIM2
FAM160A2
TNPO1
CTDSP1
LEMD3
BRD4
ABHD15
ITGB1BP1
TTC5
IDH2
PTPN1
NUP214
ADRB2
SACM1L
PRELID1
EGLN2
NPEPPS
HNRNPA0
PSMB7
OSTF1
PRMT5
TMEM14C
INTS9
ILVBL
ZNF213
DARS
BCS1L
CHMP2A
CERK
POR
POMGNT1
SUCLG1
SRP9
DOM3Z
PSME4
SLC35C2
FAM76B
N4BP2
PSMD8
FTSJ1
ARIH2
MAP2K4
HN1
KRR1
EIF2B5
ZC3H14
ZNF148
PHKG2
EIF4G1
PSMA6
ARHGAP17
POLR2B
PRPF3
MED23
TRAPPC10
BIN1
AQR
RANBP2
RCC2
PRPF8
VASP
MED22
STX4
TMEM106A
PACS1
GLTSCR2
RAB4A
SRSF9
ATP6AP1
RABEP1
ATP6V1B2
ARID5A
DNAJC13
C15orf57
SPRYD3
SKAP1
LEMD2
TMEM42
SDCBP
FCRL3
LPXN
RPS13
PSMB8
NR1H2
RBM26
BTF3
FXYD5
USP8
PPP1CA
XPO6
TESC
VPS37A
DGUOK
PCYOX1
PTBP1
TRIM25
CLK1
GLG1
C19orf10
KIAA0907
CLINT1
PPP2R1A
DGKA
MED8
TBL3
SEC61A1
RPL36
FAM193A
RNPC3
PPP1CC
SNRK
RAB5C
C19orf60
TMUB2
NMRAL1
HPCAL1
SUPT4H1
ASXL1
STK40
DSTYK
UROS
CCT7
PPP1R15A
PNN
DRAP1
NRIP1
RBM42
PPM1G
B4GALT7
TRIM27
SERTAD1
G3BP2
ZMYM5
PSMB6
MBD1
ZNF408
SRPR
PTEN
CCNL2
NAPA
RAD21
SSR4
RNF41
PYCARD
ANKRD17
RBX1
NDUFA11
CD46
EIF1AX
EVI5L
CDK11A
TFB1M
ISY1
MSH2
PLRG1
MED25
ABHD14B
ARL8B
NFATC3
ARPC1B
CDC23
UBE2D3
TAB2
UBE2F
GLIPR1
ZFR
FBXW7
ZC3HAV1
FAM63B
LMAN2L
PSMD14
RHOG
ITPR1
UBXN6
PHF11
EIF4ENIF1
TMED3
TMED4
NCSTN
HSD17B10
DIABLO
CACYBP
TMEM160
LRP11
APPL2
CNOT8
TMEM183A
JMY
PRDX1
BIRC2
MATR3
PLSCR3
TRIM14
DCXR
HEBP2
RPS27
LDB1
LANCL1
CSNK1A1
PSAP
TAF6L
MRPL37
ATP6AP2
AGPAT6
EML4
HNRNPD
SURF1
UQCRFS1
RALY
FBXL15
RNF19A
SLU7
PAK2
PRDM2
CCNL1
ANKRD44
REEP4
TOPORS
UBP1
YWHAB
C19orf43
UBE2J1
ITK
SMG1
SEC63
BABAM1
UBE2K
IL10RA
CEP350
VRK1
TBL1XR1
SAFB
LSM4
GLTPD1
CTC1
CD74
EPS15L1
TMSB4X
RBM10
TSPYL1
IL7
ZC3H3
NFX1
CWC15
TMEM179B
SHKBP1
OSBPL9
GNS
PRKAG1
NNT
CSNK1G2
FAM151A
RABGGTA
CNOT3
TMEM208
TRIM5
MYL12A
TBC1D13
MTF1
WDR82
TMEM143
RPS15
PRKCSH
MED1
C11orf73
PHTF1
CELF1
BCAS2
ASCC3
NDUFA12
RSL24D1
ANXA7
DERL2
PPP1R10
CPSF6
CDC42SE2
SUV420H1
GAK
SLC35E1
TUBGCP2
PRKCD
NONO
FOXO1
RIOK3
FRYL
LAMTOR2
DDX19B
TDRD7
PARP8
COL4A3BP
GPS1
TCEA1
MTMR3
NFATC1
IRF2
USP38
AOAH
AKR1A1
YTHDC1
ATP5C1
BTN2A2
STX8
DGAT1
MAP4K2
CASP8
LAGE3
PIK3CD
TM7SF3
SDF4
CCR7
KCNA3
ZMYM2
USP39
WBP2
GGNBP2
RPS15A
MSH3
HNRNPR
IL10RB
ARPC4
SELL
RIT1
ATP10D
RBBP7
SNX5
ULK2
ZC3H11A
CCNI
COPS6
DBNL
CSNK2A1
TAF7
PSMA3
STRN
C14orf80
ZNF598
RPF1
IGBP1
KLHDC2
TIA1
ZFP106
PYGO2
RNF31
LCAT
PCNP
XAF1
DPY30
UBR3
ACAA2
CHFR
LCOR
EP300
OGFR
CNST
EI24
ST8SIA4
C6orf106
MBNL3
LAT
STT3B
RSF1
SLC30A7
MRPL10
DNAJB2
BRWD1
YTHDF1
HAX1
NHP2
NOL8
GYPC
IFT52
SPNS1
C11orf58
SPN
SLC39A1
SNAP23
UBQLN2
PCM1
FCGR3B
TOB2
RPL24
TNRC6A
RPN1
POGK
CCDC53
U2SURP
MFSD5
IQGAP2
MED17
PRKX
SON
HSD17B4
CNBP
ERAP1
GGA3
LGALS3BP
MAGED1
MGA
SLC25A4
JAKMIP1
TAOK3
RNF216
RNF5
AAGAB
PHC3
USP14
MRPL23
COPS8
NGRN
EEF2
SH3KBP1
CTU2
SLMAP
RPS6KB2
NGDN
MYO18A
R3HDM2
IGHMBP2
TPCN2
VPS52
RAB24
GRK5
PPP2CA
ANXA11
L3MBTL2
SPRY2
RPS14
PSMD2
PSMB1
VAMP7
SERF2
CNOT10
LSM7
RRBP1
COG5
CD3D
TMED10
ARID3B
GTF2E2
MAT2B
HSBP1
ABCA7
DYRK1A
ARL2
PLEKHM2
NR2C2
MRPS6
RNF7
EEF1A1
SLC25A20
PRDX5
PNMA1
TOR1A
UBAC2
GPS2
MAGT1
PTP4A2
GET4
GIMAP6
TCF12
RBM12
REV3L
TAX1BP1
TFG
FRMD8
TNFAIP8
KIDINS220
RUVBL1
FTSJ3
TSPAN3
ARPC2
PPIE
EEF1D
STX16
AXIN1
PTPN7
DIS3L
EIF3B
BCL3
MBTPS1
RAP1B
RB1CC1
CCDC9
SNRNP70
CDAN1
UBE3A
C14orf166
UFC1
FXR1
C19orf25
SIK1
SEC11C
SKIV2L2
ASB6
TRIOBP
BTBD6
ATP5J
CCDC84
UBE2N
DNM1L
BTBD1
KIAA1671
DUSP1
RAD9A
ITM2A
UPP1
WAPAL
TRAF1
ILF2
HPS3
MSL3
ROCK2
LAMP1
MANF
NCOA5
SYS1
NAE1
MORF4L1
CNN2
LAT2
MRPS15
CPSF4
SLC15A4
CYB561D2
UBA3
PIH1D1
TACC1
CDC42
MTIF2
DAD1
SERPINB1
GTF3C2
ICAM2
ARID2
NOP2
CBR1
CABIN1
DTX2
ACBD3
RB1
USP47
PRF1
DHRS7
LAIR1
NUP153
GTF2A2
SAP130
WBP1
SRP54
PTPN22
TBC1D1
PLEKHA1
SLTM
RNF20
HMG20A
DCAF8
TCF7
PIGC
EIF4EBP2
RPS19
FGD3
PDCD7
DNAJB1
KAT2B
HOPX
PARP14
CHCHD7
PPM1F
ARRDC3
PFDN6
TFIP11
SETDB1
RAB11FIP4
FLOT2
BRE
SLC30A9
NDST2
MED29
SNAPIN
PPP2R5C
DHX16
STAG1
ARHGEF7
NMI
UTRN
KPNA1
FAM58A
PDCD4
OTUB1
PRDX3
NDUFAB1
MTMR14
TNRC18
URGCP
MFSD6
ZNF281
PPT1
MAD1L1
ABCE1
JMJD6
ATP6V0E1
NDUFV1
TMEM180
H2AFV
PSMC1
NLRC3
SLAIN2
SEPW1
MAP2K1
FCER1G
TARBP2
ARID4A
ARHGAP15
DDX1
PTPN11
ITFG1
SRSF1
KLHL20
TRERF1
PHC1
USP7
PHF20L1
PCTP
P4HTM
IKBKB
TIMP1
FCHSD2
ATF4
PHF15
QDPR
SMEK1
KIF2A
ALDH2
TANK
GRAP
WDR1
PRRC2C
TRAPPC8
SNW1
SETD5
COPS3
ZNHIT1
RHBDD2
EIF3A
TMEM55B
CALU
BIN2
AKNA
PQLC1
AKAP13
CORO1C
NAA20
YTHDF3
ZFYVE20
TCP1
DPP3
IRAK1
ATP5D
CEP57
RBBP4
COX10
C6orf47
MEF2D
C20orf27
TXNDC11
UBAP2L
PPHLN1
TIMM23
SAT1
GLO1
EIF3F
RRP12
MID1IP1
CD2
RHBDF2
SMYD2
NEDD9
G3BP1
MAGED2
PTOV1
PEPD
VPRBP
FBXW5
DTNBP1
MEA1
S100A6
REV1
EIF3L
N4BP2L1
H2AFZ
B2M
FHOD1
GMFG
EIF2AK3
SLC25A5
SRP14
USP42
PAFAH1B2
CDC16
AZIN1
ZFX
NDUFA2
RNH1
VPS18
NMT1
FOXN2
CASP10
SLK
PHF19
INPP4A
FAF2
RXRB
FAM96A
SUN2
COPB2
C9orf78
BSDC1
SLC50A1
NCOR2
NGLY1
ABHD14A
IFNGR1
MRPS34
NDUFS2
GLB1
SEC23IP
FOSL2
LTB
CSRNP1
MAP3K14
ZBTB48
TKT
IMPDH1
POGZ
DCLRE1C
RECQL
AHNAK
ATG12
ST6GAL1
KRTCAP2
GUK1
GZMH
C22orf32
ERP44
SH3GL1
ETFA
MAX
CALM1
WDFY1
USP48
SLC35A1
PTPRA
CDCA7L
LRRC8D
DDX39A
STT3A
EZH2
ANGEL1
NIPBL
NDUFA1
PARP4
TCERG1
C9orf69
SFT2D1
DLG3
AIDA
IL21R
FAM89B
ZNF143
ZNF414
PDCD10
C22orf29
NDUFB2
MKNK2
PIK3CG
RNASEH2C
SLA
ADD3
ITPA
VCL
FBXO11
TRIM11
DAP
PPP1R7
DNAJA3
LMNB2
RRP1B
TXNRD1
PGAP3
LRIG1
CYB5R3
CST7
SCAMP3
ORMDL1
JOSD1
NCKAP1L
TBC1D10C
CRLF3
UBR5
HIATL1
CCNG1
DHPS
KLC4
MEAF6
UBE2Q2
ARL5A
HMGN1
DGKQ
SHC1
IRF9
SDHAF1
SNX11
FAM65B
CASC3
ATP1A1
RPLP1
PFDN1
CPSF3
LPGAT1
WIPI2
FAM105A
DENND4A
CD8A
DDX39B
MAP2K3
MCOLN2
ZNF672
SRRM1
RPL9
SNX3
PRAF2
DNMT1
DR1
MAP7D1
EHBP1
ZRANB2
XRCC6
GLUD1
IAH1
NR1H3
DCTD
EIF4H
TCEB2
CDK2AP2
WRNIP1
FBXO21
SLC35A2
AAK1
EZH1
RPS6KA5
SMARCA5
MYO5A
TXNRD2
COTL1
MYH9
PPP6R3
CCDC130
RPS6KA3
PTK2B
NAA10
CDC25B
COQ9
FBXO46
CITED2
ARL4C
LFNG
NDUFA4
C7orf26
TCF20
VMP1
GALK1
SUPT16H
ANAPC11
PHIP
SUB1
TXLNA
MADD
FGL2
HDGF
PIK3R5
TSSC4
LIN37
WDR61
HOOK3
DKC1
ANAPC4
LRRC47
ATP5A1
DDX26B
PRKACB
C11orf31
SCAF11
RABAC1
PRPF38A
SSR2
AKT1
CORO1A
TUBB
HSD11B1L
GHITM
RAB40C
CRIP1
MRPL27
MED20
LPAR2
SELT
AHCTF1
PPIG
EIF2AK4
SRSF10
KIAA1257
MITD1
VPS41
DUSP23
C11orf83
ACOT7
GRHPR
DPP8
DNM2
EEF1B2
SKIV2L
SRGN
ZBTB17
KIAA1967
KIAA2026
CUL1
EPS15
SKP1
BPTF
KDM5C
THOC6
BANF1
FAM203A
DNAJB12
SMARCE1
TAGAP
CLK2
CEP120
UBQLN4
TNIK
MORF4L2
ABCB10
CORO1B
FKBP15
RNF114
LAP3
PLD3
PRAM1
DUS2L
IFRD2
PNKD
CHD6
SLC12A9
PANK2
MAPK1
STX11
CMTM3
PPA1
PCIF1
EBP
RRP7A
UBE2H
TOP3A
DFFA
PNRC1
TOMM7
ARL6IP4
RPL30
SMC4
PIP4K2B
MLEC
RASAL3
PSME3
RALGDS
HMOX1
CCNY
GLT8D1
PKN1
TFDP1
NACA
NXF1
NCOA2
HAGH
NDUFA8
FAM193B
EDC4
HERC3
IMP4
DENR
PUM1
IFI27L2
MRPS25
TBL1X
SNX1
TMEM71
PDS5B
SSB
LBR
SMPD4
EDEM1
WDR5
TGOLN2
ACSL5
NOSIP
CHCHD2
NBN
RPS26
SNRPB2
TPM2
LCP2
PIK3R2
TNFAIP3
CD58
FERMT3
ZNRD1
RAB37
SRSF11
TEX2
C5orf42
JTB
ABCD4
HELQ
RIPK2
NDUFC1
SF3B14
AP2B1
CLTA
MED13L
TTC19
TMEM156
RCOR3
SMC6
DYNLRB1
SYTL2
BAP1
USP4
DGCR6
SNTB2
PGS1
FARSA
CUL5
ZCCHC7
EML2
DNAJC7
DGCR14
SLC9A9
ACTR10
PLCG1
CCDC109B
TRAPPC1
ARSA
ST6GALNAC4
ITGA5
RPL14
RPL8
SLC44A2
SUSD1
PES1
FYB
VCPIP1
TPT1
TCOF1
GCLM
DOCK11
CIAO1
NCOR1
GGH
CRK
PTAR1
PDXDC1
ZNF317
RAP1GAP2
HPSE
RRAS2
APOA1BP
NDNL2
SMG7
CPD
TCF25
MRPS27
DOCK2
PDGFD
CBLL1
WWP2
CXCR2
KIAA1033
EXT2
GLCCI1
TMF1
GLYR1
GORASP2
DAZAP1
CUX1
ZNF212
OSBP
VPS35
NKTR
TMEM229B
PHF23
VPS11
CUL4B
ABCF3
TMX2
ESYT2
LRSAM1
CEP170
CD37
RTN3
SBNO1
CMPK1
HMGN2
SP140L
PSPC1
TRAPPC4
ADAM10
NDUFB10
LCP1
EIF1B
LASP1
PITPNC1
TCF19
CRELD1
PTGDR
ABI3
RHOU
SRRM2
TSPAN2
PRPF6
CD79A
SLC20A1
TMEM115
GNL3
CAST
ATP6V0B
UBE4A
CASP9
DVL1
SP100
RPL35
UBL5
ATXN2
ZFAND2A
NUDC
FBXL6
PRKCH
ZNF259
LGALS3
NAA25
SLC25A39
TINF2
C18orf25
CCDC93
TTC37
ARAP2
RGL2
LEPRE1
MAZ
WRAP53
PRR13
TRAPPC6B
SUGP2
ACTG1
KLRC1
COMMD6
SHPRH
ABHD11
HERPUD1
GLRX
CASC4
RAB11B
IRAK2
ELMO2
IL16
ACADS
TGIF1
FRG1
TLK1
SEL1L
INPP4B
MED16
PSKH1
KPNA6
NT5C3
FASTK
UPF2
CLPP
ARPC5L
NUP205
MXI1
FUCA1
LSM12
DHCR24
ZNF777
NIPA2
KLF2
PAPD5
SNX4
MAPRE2
ZDHHC16
MKLN1
CYTH2
PRKD3
COG1
CBX3
ZBTB7A
C19orf6
BLMH
SCYL1
OSBPL5
TMEM120B
RSU1
RAE1
[truncated: 583 more rows]

## Sheet: FRT
Table 5: RMtsig genes modulated by SIV in FRT
Genes in RMtsig
CLEC2D
HEBP2
RPL26
RPL21
DPF2
LRP11
LANCL1
BZW1
AAK1
PTGES3
IFITM1
HOPX
DSTN
FTSJD2
WARS
ATXN2
EI24
ATP11B
NAGK
SLK
ATP5C1
C11orf73
RPL29
PURA
SLC38A2
TPM4
MTSS1
VDAC1
ATP1B3
SERPINB1
CXXC1
MTDH
MED27
PLAC8
SRSF3
STAT2
CRK
ISG20
TMEM222
CTBP1
PEX16
NUB1
OAS2
CDC42
ATP6V1E1
CLK1
ST13
UBA7
YWHAB
PARP14
RAN
PRPF3
PSMD14
ADAR
TRIM21
COQ6
AK3
AHSA2
SRP9
PABPC1
MED24
TRPC4AP
APOL2
KTN1
PRKDC
UNC93B1
ZRSR2
GLRX3
NNT
HSPD1
MKRN1
RPL7
NAA50
PSMB9
SLMAP
BUB3
CBFB
VPS37A
NUCB2
IFI35
FAM172A
BST2
PTMA
PTPLAD1
STT3B
COG5
SH3BGRL
DKC1
NPTN
C19orf53
CWC22
RAB4B
SERINC1
DHX15
ATP6V1F
KDM5A
IRF7
PTEN
RIT1
CENPK
CDC37
RBM33
UBE2N
NAE1
DR1
AGPS
STAT1
UCHL5
TXNDC15
HMGXB3
DNAJC8
DYNLL1
CTNNB1
UBE2L6
ZNFX1
ILK
GNL3
MSH3
UBQLN1
SRSF5
ZFAND2A
RDBP
YME1L1
CSNK1A1
AKAP1
DDX60
GNS
SYTL1
C1QBP
DLD
UBE2E3
SLC30A9
MLLT6
ZBP1
SFPQ
NSD1
RHOA
PARP6
GLTP
C19orf66
HSH2D
ACTR3
BZRAP1
TXNIP
STOM
DUSP7
ALG3
MED29
CPNE3
CHD4
EIF3M
PIAS4
ENSA
LDHA
IFI27
HMOX2
CCDC94
FAM108B1
PARP12
RPL10A
AKIRIN2
DDX27
SLC25A28
MCFD2
SP140L
SYVN1
RPL24
YY1
RBMS1
REXO1
NLRC5
ZMYND11
VPS13A
UQCRC2
DHCR24
COPS8
PGM2
FGD3
LAIR1
CUL4B
EIF3G
HAT1
HMGB1
MRPS18B
EEF1B2
TCF20
SMG7
KIF5B
RAPGEF1
PRKAR1A
EIF3A
GGH
G3BP1
CLK3
ITGB1BP1
FKBP3
SIPA1
BCAS2
VPS11
USP20
DMAP1
PSMD12
ETFA
CD59
SRSF8
CCND2
DNM1L
PGAM1
APOBEC3G
APOBEC3H
BRD2
RNF40
PRKCSH
PITPNC1
ASCC3
TUBA4A
PSME2
SLFN5
RBM10
SSBP1
BTN2A2
C14orf159
PSMC1
ASXL2
SLC4A1AP
TRIM25
CD44
TAP1
CD79A
DNPEP
PARP4
ZMAT2
PBRM1
RPS6
CLTB
LY6E
PDPK1
RELA
RNF11
RUFY1
ETHE1
SEC11C
ESD
H2AFV
AKAP13
METAP2
COX6B1
QKI
C6orf1
TMEM106C
C14orf166
PARP9
DNAJB1
TNK2
KRTCAP2
DNAJB6
SVIL
ARL8B
KAT2A
UBR4
COPS4
SYPL1
HNRNPA0
RNF115
WBP1
TRIM38
ZNF706
NBR1
RALGAPA1
SS18
GPBP1L1
HNRNPH3
HLCS
RFFL
CSE1L
SLC20A1
ELMO2
HK1
HERPUD1
MAP7D1
PRKD3
MAZ
ARL6IP5
CSTB
PSMD6
C1orf43
TAP2
GSPT1
SNAP23
VAMP7
PLEKHM1
RAB5B
KLHL21
CHD8
STK39
FLNA
ST6GALNAC4
GYG1
EIF1AX
TRMT2A
HM13
PARP10
TSNAX
WDR33
LPCAT3
UBE2G1
UBA3
EWSR1
AACS
RPS3A
AQR
ITPA
POLR1D
PPP1R12A
DNAJB12
NGDN
MRPL9
STAT6
H2AFY
RPL6
CD52
ROCK1
PDCD7
UQCRH
TMEM131
GOT2
CIRBP
CACYBP
RB1
PWP2
RPA1
RAPGEF2
MAN1A2
COPS7B
VPRBP
KBTBD4
PGAM5
GLO1
SP3
USO1
C16orf54
TMEM42
TRABD
ANXA7
PSMF1
IKBKB
PQLC3
ZYX
PSMD1
SETD2
BTBD1
HDAC2
KLC4
DDX60L
FBXW7
RPL14
GRAMD1A
DNAJB11
NOSIP
SETDB1
MBD2
CHCHD2
RPS6KA4
AZIN1
UBE2A
CTU2
SP110
ABCE1
SIK3
ADCY7
NDEL1
C19orf25
RPL5
PML
SOD1
CIZ1
TPM2
CCL3L1
IFI6
TMEM143
USP4
EIF2B3
PYCARD
TEX264
SPPL2B
PDZD8
PPIE
HNRNPA1
BTF3
TM9SF3
EED
PHF11
PTPRJ
VPS35
H2AFX
NF2
ADSS
ANO8
ARAF
COX7B
SLA2
RIOK3
PICALM
CEP250
CDC14A
PSMB10
IRF8
GRIPAP1
RNF41
HSPH1
RBM38
SERTAD3
TBC1D10A
MTPN
VAMP5
LCP1
LCK
SDCBP
STT3A
VOPP1
CHTF8
VDAC2
PAIP2
PAPD5
TMEM229B
NAP1L1
TMX2
SUGP1
WAS
PSME1
SOS1
YTHDF2
DCTN1
NDUFB5
CSNK1G2
AP3S1
EIF2B2
VAV3
WDR26
SRSF6
FRG1
SMARCC2
UBE2G2
TROVE2
DVL1
RTN4
SRSF10
CUX1
ARCN1
WDR83
SPRY2
TYK2
XPOT
